# Supplementary material
Source: PubMed Central journal article supplement (PMC2689800)
Supplement: en.2008-0877_3.pdf [file en.2008-0877_3.pdf]

Supplemental Table 1.

| Gene                   | Forward                      | Reverse                    | Size (bp) |
|------------------------|------------------------------|----------------------------|-----------|
| <i>Actb</i>            | TGT TAC CAA CTG GGA CGA CA   | TCT CAG CTG TGG TGG TGA AG | 392       |
| <i>Fgf23</i>           | TGG GCA CTG CTA GAG CCT AT   | GCA AAT CTC TGG GCT GAA GT | 284       |
| <i>Galnt3</i>          | GAG AGA CCC TGT CTG CAA GG   | GTG GAC CAT GCT TCA TTG TG | 320       |
| <i>Gapdh</i>           | AAC TTT GGC ATT GTG GAA GG   | CCC TGT TGC TGT AGC CGT AT | 472       |
| <i>Kl</i> <sup>A</sup> | CCC ACT ACC GCT TCT CCA TA   | TGG GAG CTT AAG GCG ATA GA | 469       |
| <i>Slc34a1</i>         | CCA GCT GGA CAA GTC TGT GA   | ACA GTA GGA TGC CCG AGA TG | 620       |
| <i>Slc34a3</i>         | GAT CCC TGG ACC TTC TCT CC   | TGT GAG CCA GTT GAA GAT GC | 477       |
| Gene                   | TaqMan Gene Expression Assay |                            | Size (bp) |
| <i>Cyp24a1</i>         | Mm01165919_g1                |                            | 99        |
| <i>Cyp27b1</i>         | Mm00487244_m1                |                            | 81        |
| <i>Actb</i>            | Not applicable               |                            | 115       |

<sup>A</sup> Primers were designed in exons 1 and 2 to capture both secreted and membrane-bound forms of Kl.
